# Supplementary material for: Metabolomics Analyses Reveal Metabolites Affected by Plant Growth-Promoting Endophytic Bacteria in Roots of the Halophyte Mesembryanthemum crystallinum
Source: MDPI journal article supplement (doi:10.3390/ijms222111813), 2021-10-30

## Supplementary Materials

### **Metabolomics analyses reveal metabolites affected by plant growth-promoting endophytic bacteria in roots of the halophyte *Mesembryanthemum crystallinum***

Ryota Kataoka<sup>1\*</sup>, Mami Akashi<sup>1</sup>, Takeshi Taniguchi<sup>2</sup>, Yoshiyuki Kinose<sup>1</sup>, Ahmet Emre Yaprak<sup>3</sup>, Oguz Can Turgay<sup>4</sup>

1. University of Yamanashi, Faculty of Life & Environmental Sciences, Department of Environmental Sciences, Takeda, Kofu, Yamanashi, Japan.

2. Aridland Research Center, Tottori University, Hamasaka, Tottori, Japan.

3. Ankara University, Faculty of Agriculture Department of Soil Science and Plant Nutrition, Ankara, Turkey.

4. Ankara University, Faculty of Science, Department of Biology, Ankara, Turkey.

\*Corresponding Author: [rkataoka@yamanashi.ac.jp](mailto:rkataoka@yamanashi.ac.jp), 0081-55-220-8839

**Table S1** Heatmap and tabular presentation of all metabolites based on relative peak area in the control and strains 4- and 2-applied *Mesembryanthemum crystallinum* plants. Green (low) to red (high) represents the increase in relative area of each peak among the three treatments.

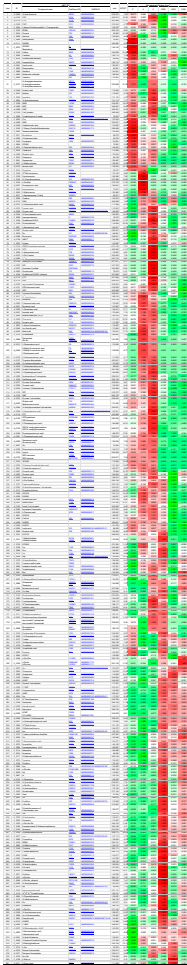

**Table S2** Conditions of cation and anion modes for CE-TOFMS-based metabolome analysis.

| <b>Cationic Metabolites (Cation Mode)</b> |                                                                                                                                                                                                                                                                                                      |
|-------------------------------------------|------------------------------------------------------------------------------------------------------------------------------------------------------------------------------------------------------------------------------------------------------------------------------------------------------|
| Device                                    | Agilent CE-TOFMS system (Agilent Technologies Inc.) Machine No. 6<br>Capillary: Fused silica capillary i.d. 50 $\mu$ m $\times$ 80 cm                                                                                                                                                                |
| Analytical                                | Run buffer: Cation Buffer Solution (p/n : H3301-1001)                                                                                                                                                                                                                                                |
| Condition                                 | Rinse buffer: Cation Buffer Solution (p/n : H3301-1001)<br>Sample injection: Pressure injection 50 mbar, 10 sec<br>CE voltage: Positive, 30 kV<br>MS ionization: ESI Positive<br>MS capillary voltage: 4,000 V<br>MS scan range: m/z 50-1,000<br>Sheath liquid: HMT Sheath Liquid (p/n : H3301-1020) |
| <b>Anionic Metabolites (Anion Mode)</b>   |                                                                                                                                                                                                                                                                                                      |
| Device                                    | Agilent CE-TOFMS system (Agilent Technologies Inc.) Machine No. 5<br>Capillary: Fused silica capillary i.d. 50 $\mu$ m $\times$ 80 cm                                                                                                                                                                |
| Analytical                                | Run buffer: Anion Buffer Solution (p/n : H3302-1023)                                                                                                                                                                                                                                                 |
| Condition                                 | Rinse buffer: Anion Buffer Solution (p/n : H3302-1023)<br>Sample injection: Pressure injection 50 mbar, 22 sec<br>CE voltage: Positive, 30 kV<br>MS ionization: ESI Negative<br>MS capillary voltage: 3,500 V<br>MS scan range: m/z 50-1,000<br>Sheath liquid: HMT Sheath Liquid (p/n : H3301-1020)  |

**Figure S1** Growth of ice plants in different soils under a range of salinity conditions. Values are means  $\pm$  SD, ( $n=3$ ), Tukey's HSD ( $p < 0.05$ ).

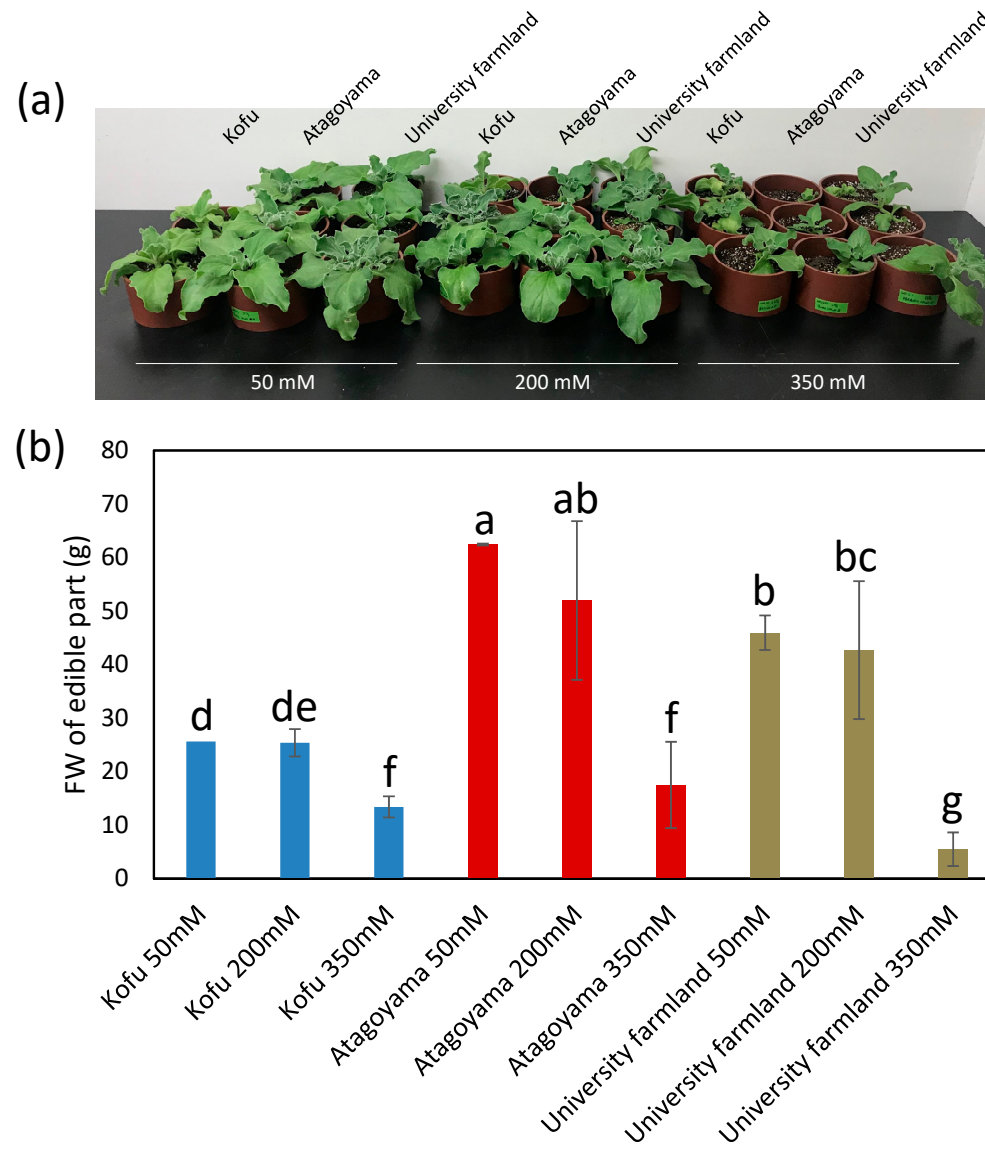

**Figure S2** Initial Ice plant growth with selected strains (a), and plate photo of selected strains in this study (b).

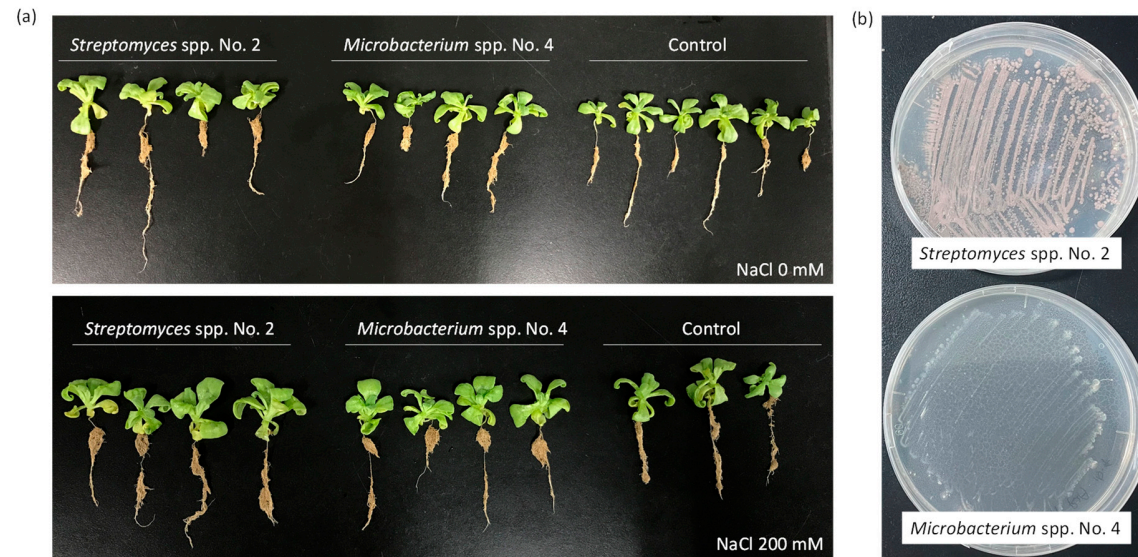

Supplement: s1 [file s1]
